# Supplementary material
Source: Springer Nature journal article supplement (https://www.springermedizin.de/resource/supplementary/12970_2010_167_MOESM1_ESM.pdf/9594498)
Supplement: MOESM1 [file 9594498]

n = 54 participants enrolled

Random allocation to tart cherry juice or placebo  
(participants on same team allocated same drink)

n = 28 cherry juice

n = 26 placebo drink

**Day 1 – Baseline**

Physician screening  
Participants given 16 bottles of drink  
Participant-Assessed Pain (VAS – 100mm)

**Drop-Outs**

n = 2 from cherry group  
(1 lost to follow up, 1  
due to GI distress)

**Day 7 – Race Start**

Physician screening  
Participant-Assessed Pain (VAS – 100mm)

**Drop-Outs**

n = 1 from placebo  
group (NSAID use)

Hood to Coast Relay

(~ 28 hours)

Each participant runs 3 race legs  
(total distance: 22.5 – 31.4 km)

**Day 8 – Race End**

Physician screening  
Participant-Assessed Pain (VAS – 100mm)  
Satisfaction/Willingness to use drink again (Likert Scale)
